# Supplementary material
Source: Springer Nature journal article supplement (https://www.springermedizin.de/resource/supplementary/12885_2014_4965_MOESM1_ESM.pdf/9467872)
Supplement: MOESM1 [file 9467872]

Table S1. Tumor genotyping panel developed for this study

| Gene Name | Type <sup>1</sup> | Position | Amino acid mutant    | Nucleotide mutant      | Positive control cell lines                                              | Method <sup>2</sup> | PCR primer <sup>3,4</sup>             |                                       |                          | Amplicon Length (bp) <sup>5</sup> | Reference               |
|-----------|-------------------|----------|----------------------|------------------------|--------------------------------------------------------------------------|---------------------|---------------------------------------|---------------------------------------|--------------------------|-----------------------------------|-------------------------|
|           |                   |          |                      |                        |                                                                          |                     | Forward                               | Reverse                               | Sequence                 |                                   |                         |
| EGFR      | SNV               | G719     | G719C/S<br>G719A     | 2155G>T/A<br>2156G>C   | -                                                                        | P                   | TCCCAACCAAGCTCTCT<br>TGAGG            | <b>*CTGTGCCAGGGACCTT<br/>ACCTTATA</b> | AAAAAGATCAAA<br>GTGCTG   | 109                               | [1-9]                   |
|           | Deletion          | exon 19  |                      |                        | PC-9 (E746_A750del),<br>HCC827 (E746_A750del),<br>HCC4006 (L747_E749del) | F                   | TCCCAGAAGGTGAGAA<br>AGTTAAAA          | CACAGCAAAGCAGAAA<br>CTCACAT           |                          | 110                               |                         |
|           | SNV               | T790     | T790M                | 2369C>T                | NCI-H1975                                                                | P                   | CTGGGCATCTGCCTCA<br>CCT               | <b>*GTCTTTGTGTTCCCGG<br/>ACAT</b>     | CCGTGCAGCTCA<br>TCA      | 90                                |                         |
|           | Insertion         | exon 20  |                      |                        | -                                                                        | F                   | CATGCGAAGCCACACT<br>GAC               | GAGGCAGATGCCCAGC<br>AG                |                          | 102                               |                         |
|           | SNV               | L858     | L858R                | 2573T>G                | NCI-H1975                                                                | P                   | GAAAACACCGCAGCAT<br>GTCA              | <b>*TTTGCCCTCTTCTGCA<br/>TGGTA</b>    | AAGATCACAGAT<br>TTTGG    | 91                                |                         |
|           | SNV               | L861     | L861Q                | 2582T>A                | -                                                                        | P                   | GAAAACACCGCAGCAT<br>GTCA              | <b>*TTTGCCCTCTTCTGCA<br/>TGGTA</b>    | AAGATCACAGAT<br>TTTGG    | 91                                |                         |
|           | CNG               |          |                      |                        |                                                                          | HCC827, A431        | qPCR                                  | GAATTCGGATGCAGAG<br>CTTC              | GACATGCTGCGGTGTT<br>TTC  |                                   |                         |
| KRAS      | SNV               | G12      | G12C/S/R<br>G12V/A/D | 34G>T/A/C<br>35G>T/C/A | A549 (G12S)<br>NCI-H441 (G12V)                                           | P                   | GGCCTGCTGAAAATGA<br>CTGAA             | <b>*TTAGCTGTATCGTCAA<br/>GGCACTCT</b> | TGTGGTAGTTGG<br>AGCT     | 82                                | [1-4, 11,<br>12]        |
|           | SNV               | G13      | G13C/S/R<br>G13D/A   | 37G>T/A/C<br>38G>A/C   | -<br>DLD-1 (G13D)                                                        |                     |                                       |                                       |                          |                                   |                         |
|           | SNV               | Q61      | Q61K                 | 181C>A                 | -                                                                        | P                   | AATTGATGGAGAAACCT<br>GTCTCTT          | <b>*TTATGGCAAATACACA<br/>AAGAAAGC</b> | CTCGACACAGCA<br>GGT      | 119                               |                         |
|           |                   |          | Q61R/L               | 182A>G/T               | -                                                                        |                     |                                       |                                       |                          |                                   |                         |
|           |                   |          | Q61H                 | 183A>T/C               | NCI-H1155 (183A>T)                                                       |                     |                                       |                                       |                          |                                   |                         |
| BRAF      | SNV               | G466     | G466V                | 1397G>T                | NCI-H1666                                                                | P                   | GAGATTCTGTATGGGC<br>AGATTA            | <b>*TACATACTTACCATGC<br/>CACTTTCC</b> | GACAAAGAATTG<br>GATCTG   | 93                                | [1-4,<br>13-15]         |
|           | SNV               | G469     | G469A                | 1406G>C                | NCI-H1395, NCI-H1755                                                     |                     |                                       |                                       |                          |                                   |                         |
|           | SNV               | L597     | L597V                | 1789C>G                | -                                                                        | P                   | AAGACCTCACAGTAAAA<br>ATAGGTG          | <b>*AAAATGGATCCAGAC<br/>AACTGTTT</b>  | AAAAATAGGTGA<br>TTTTGGT  | 97                                |                         |
|           | SNV               | V600     | V600E                | 1799T>A                | HT29, COLO201                                                            |                     |                                       |                                       |                          |                                   |                         |
| PIK3CA    | SNV               | E542     | E542K                | 1624G>A                | IM95                                                                     | P                   | <b>*GAACAGCTCAAAGCA<br/>ATTTCTACA</b> | TAGCACTTACCTGTGAC<br>TCCATAG          | AGAAAATCTTTCT<br>CCTGCT  | 90                                | [1-4, 13,<br>14, 16-18] |
|           | SNV               | E545     | E545K/Q              | 1633G>A/C              | DLD-1 (E545K)                                                            |                     |                                       |                                       |                          |                                   |                         |
|           | SNV               | H1047    | H1047R               | 3140A>G                | -                                                                        | P                   | <b>*AGCAAAGAGGCTTTGG<br/>AGTATTTT</b> | GTTCAATGCATGCTGTT<br>TAATTGT          | GTTGTCCAGCCA<br>CCA      | 110                               |                         |
|           | CNG               |          |                      |                        | Calu3, NCI-H520                                                          | qPCR                | ATCTTTTCTCAATGATG<br>CTTGGCT          | CTAGGGTCTTTTGAATG<br>TATG             |                          | 81                                |                         |
| NRAS      | SNV               | Q61      | Q61K<br>Q61L/R       | 181C>A<br>182A>T/G     | -<br>HepG2 (Q61L)                                                        | P                   | TGGTGAACCTGTTTGT<br>TGGACAT           | <b>*TGGTCTCTCATGGCAC<br/>TGTACTCT</b> | ATACTGGATACA<br>GCTGGA   | 69                                | [1-3, 20]               |
| MEK1      | SNV               | Q56      | Q56P                 | 167A>C                 | NCI-H1437                                                                | P                   | ATGAGCAGCAGCGAAA<br>GC                | <b>*AGCCCCAGCTCACT<br/>GATC</b>       | GAGGCCTTTCTT<br>ACCC     | 101                               | [1, 3, 13,<br>21]       |
|           | SNV               | K57      | K57N                 | 171G>T                 | -                                                                        |                     |                                       |                                       |                          |                                   |                         |
|           | SNV               | D67      | D67N                 | 199G>A                 | ES-2                                                                     | P                   | <b>*GCCTTGAGGCCTTTCT<br/>TACCC</b>    | ACACCACACCGCCATT<br>GC                | CTCACTGATCTT<br>CTCAAAGT | 102                               |                         |

Supplementary Table S1. Tumor genotyping panel developed for this study (*continuation*)

| Gene Name     | Type <sup>1</sup>                     | Position                                                            | Amino acid mutant | Nucleotide mutant | Positive control cell lines  | Method <sup>2</sup> | PCR primer <sup>3</sup>                                                                                                                                                                                                  |                                   |                      | Reference |                       |
|---------------|---------------------------------------|---------------------------------------------------------------------|-------------------|-------------------|------------------------------|---------------------|--------------------------------------------------------------------------------------------------------------------------------------------------------------------------------------------------------------------------|-----------------------------------|----------------------|-----------|-----------------------|
|               |                                       |                                                                     |                   |                   |                              |                     | Forward                                                                                                                                                                                                                  | Reverse                           | Sequence             |           |                       |
| <i>AKT1</i>   | SNV                                   | E17                                                                 | E17K              | 49G>A             | -                            | P                   | CTGACGGGTAGAGTGT<br>GCG                                                                                                                                                                                                  | <b>*GCCGCCAGGTCTTGAT<br/>GTA</b>  | CGCACGTCTGTA<br>GGG  | 70        | [1, 3, 13, 22]        |
| <i>PTEN</i>   | SNV                                   | R233                                                                | R233*             | 697C>T            | HCI-H1155                    | P                   | TTTGTGGTCTGCCAGCT<br>AAAG                                                                                                                                                                                                | <b>*TAACGGCTGAGGGAA<br/>CTCAA</b> | CAATTCAGGACC<br>CACA | 99        | [2]                   |
| <i>DDR2</i>   | SNV                                   | S768                                                                | S768R             | 2304T>A           | -                            | P                   | <b>*ATAGGGCAAGTTCACT<br/>ACAGCAA</b>                                                                                                                                                                                     | ATAGGGCTGTTCTTGAC<br>AAAAGG       | CAAAGGCCACACA<br>CAT | 88        | [23]                  |
| <i>HER2</i>   | Insertion                             | exon 20                                                             |                   |                   | NCI-H1781 (G776insVC)        | F                   | CTCAGCGTACCCTTGT<br>CCC                                                                                                                                                                                                  | CTGCACCGTGGATGTC<br>AG            |                      | 100       | [1-4, 13, 14, 24, 25] |
| <i>MET</i>    | CNG                                   |                                                                     |                   |                   | EBC-1, NCI-H2170             | qPCR                | GCTGGTGGTCCTACCA<br>TACATG                                                                                                                                                                                               | CTGGCTTACAGCTAGTT<br>TGCCA        |                      | 112       | [1, 4, 13, 26]        |
| <i>FGFR1</i>  | CNG                                   |                                                                     |                   |                   | Calu3, NCI-H1703             | qPCR                | TTCTCATCTCCTGCAT<br>GGT                                                                                                                                                                                                  | GTGGTGCTGAGTGTGC<br>AAAT          |                      | 167       | [4, 14, 27]           |
| <i>FGFR2</i>  | CNG                                   |                                                                     |                   |                   | SNU-16, KATOIII              | qPCR                | ACTTGGGCTGGAGTGA<br>TTTG                                                                                                                                                                                                 | AATCCCATCTGCACACT<br>TCC          |                      | 164       | [27]                  |
| <i>COL8A1</i> | Control for copy number analysis      |                                                                     |                   |                   |                              | qPCR                | GGGCTAAGAAAGGCAA<br>GAATGG                                                                                                                                                                                               | GTGGGAAAGGTGCGGT<br>TAGCT         |                      | 78        | [18]                  |
| <i>LINE1</i>  | Control for copy number analysis      |                                                                     |                   |                   |                              | qPCR                | AAAGCCGCTCAACTAC<br>ATGG                                                                                                                                                                                                 | TGCTTTGAATGCGTCCC<br>AGAG         |                      | 149       | -                     |
| <i>ALK</i>    | Fusion                                | <i>EML4-ALK</i><br>(variant 1, ,2, 3a/b, 4, 5a/b, 6, 7)             |                   |                   | NCI-H2228 (variant 3)        | RT                  | TGATGTTTTGAGGCGTC<br>TTG<br>TTAGCATTCTTGGGGAA<br>TGG                                                                                                                                                                     | TGCCAGCAAAGCAGTA<br>GTTG          |                      | -         | [1, 2, 4, 13, 28, 29] |
| <i>ROS1</i>   | Fusion                                | <i>CD74-ROS1, SLC34A2-ROS1</i>                                      |                   |                   | -                            | RT                  | CCTGAGACACCTTAAG<br>AACACCA<br>TCGGATTTCTCTACTTT<br>TTCGTG                                                                                                                                                               | TGAAACTTGTTTCTGGT<br>ATCCAA       |                      | -         | [4, 14, 30, 31]       |
| <i>RET</i>    | Fusion                                | <i>KIF5B-RET</i><br>(variant 1, 2, 3, 4, 5, 6, 8), <i>CCDC6-RET</i> |                   |                   | LC-2/ad ( <i>CCDC6-RET</i> ) | RT                  | Primers and methods for detecting <i>KIF5B-RET</i> and <i>CCDC6-RET</i> fusion genes were kindly provided by Dr. Takashi Kohno (National Cancer Center, Tokyo, Japan). Therefore, we cannot disclose primer information. |                                   |                      |           | [4, 14, 32-35]        |
| <i>GAPDH</i>  | Control for reverse transcription PCR |                                                                     |                   |                   |                              | RT                  | GCACCGTCAAGGCTGA<br>GAAC                                                                                                                                                                                                 | TGGTGAAGACGCCAGT<br>GGA           |                      | 138       | -                     |

<sup>1</sup> SNV, Single nucleotide variation, CNG, Copy number gain

<sup>2</sup> P, Pyrosequencing; F, Fragment analysis; qPCR, Quantitative PCR; RT, Reverse Transcription PCR

<sup>3</sup> Bold and \*, 5' Biotinylated primers

<sup>4</sup> Amplicon length of fusion genes in each variants were not described.

## References

1. Johnson BE, Kris MG, Kwiatkowski DJ, Lafrate AJ, Wistuba II, Shyr Y, A. EJ, Khuri FR, M. DS, Pao W *et al*: **Clinical characteristics of planned 1000 patients with adenocarcinoma of lung (ACL) undergoing genomic characterization in the US Lung Cancer Mutation Consortium (LCMC)**. *J Thorac Oncol* 2011; 6 (suppl 2; abstr O1601).
2. Sequist LV, Heist RS, Shaw AT, Fidias P, Rosovsky R, Temel JS, Lennes IT, Digumarthy S, Waltman BA, Bast E *et al*: **Implementing multiplexed genotyping of non-small-cell lung cancers into routine clinical practice**. *Ann Oncol* 2011, **22**(12):2616-2624.
3. Su Z, Dias-Santagata D, Duke M, Hutchinson K, Lin YL, Borger DR, Chung CH, Massion PP, Vnencak-Jones CL, Iafrate AJ *et al*: **A platform for rapid detection of multiple oncogenic mutations with relevance to targeted therapy in non-small-cell lung cancer**. *J Mol Diagn* 2011, **13**(1):74-84.
4. Gadgeel SM: **New targets in non-small cell lung cancer**. *Curr Oncol Rep* 2013, **15**(4):411-423.
5. Lynch TJ, Bell DW, Sordella R, Gurubhagavatula S, Okimoto RA, Brannigan BW, Harris PL, Haserlat SM, Supko JG, Haluska FG *et al*: **Activating mutations in the epidermal growth factor receptor underlying responsiveness of non-small-cell lung cancer to gefitinib**. *N Engl J Med* 2004, **350**(21):2129-2139.
6. Paez JG, Janne PA, Lee JC, Tracy S, Greulich H, Gabriel S, Herman P, Kaye FJ, Lindeman N, Boggon TJ *et al*: **EGFR mutations in lung cancer: correlation with clinical response to gefitinib therapy**. *Science* 2004, **304**(5676):1497-1500.
7. Pao W, Miller V, Zakowski M, Doherty J, Politi K, Sarkaria I, Singh B, Heelan R, Rusch V, Fulton L *et al*: **EGF receptor gene mutations are common in lung cancers from "never smokers" and are associated with sensitivity of tumors to gefitinib and erlotinib**. *Proc Natl Acad Sci U S A* 2004, **101**(36):13306-13311.
8. Ohashi K, Maruvka YE, Michor F, Pao W: **Epidermal growth factor receptor tyrosine kinase inhibitor-resistant disease**. *J Clin Oncol* 2013, **31**(8):1070-1080.
9. Rho JK, Choi YJ, Lee JK, Ryoo BY, Na, II, Yang SH, Lee SS, Kim CH, Yoo YD, Lee JC: **The role of MET activation in determining the sensitivity to epidermal growth factor receptor tyrosine kinase inhibitors**. *Molecular cancer research : MCR* 2009, **7**(10):1736-1743.
10. Pirker R, Pereira JR, von Pawel J, Krzakowski M, Ramlau R, Park K, de Marinis F, Eberhardt WE, Paz-Ares L, Storkel S *et al*: **EGFR expression as a predictor of survival for first-line chemotherapy plus cetuximab in patients with advanced non-small-cell lung cancer: analysis of data from the phase 3 FLEX study**. *Lancet Oncol* 2012, **13**(1):33-42.
11. Brose MS, Volpe P, Feldman M, Kumar M, Rishi I, Gerrero R, Einhorn E, Herlyn M, Minna J, Nicholson A *et al*: **BRAF and RAS mutations in human lung cancer and melanoma**. *Cancer Res* 2002, **62**(23):6997-7000.
12. Ogino S, Kawasaki T, Brahmandam M, Yan L, Cantor M, Namgyal C, Mino-Kenudson M, Lauwers GY, Loda M, Fuchs CS: **Sensitive sequencing method for KRAS mutation detection by Pyrosequencing**. *J Mol Diagn* 2005, **7**(3):413-421.
13. Pao W, Girard N: **New driver mutations in non-small-cell lung cancer**. *Lancet Oncol* 2011, **12**(2):175-180.
14. Oxnard GR, Binder A, Janne PA: **New targetable oncogenes in non-small-cell lung cancer**. *J Clin Oncol* 2013, **31**(8):1097-1104.
15. Paik PK, Arcila ME, Fara M, Sima CS, Miller VA, Kris MG, Ladanyi M, Riely GJ: **Clinical characteristics of patients with lung adenocarcinomas harboring BRAF**

- mutations.** *J Clin Oncol* 2011, **29**(15):2046-2051.
16. Kawano O, Sasaki H, Endo K, Suzuki E, Haneda H, Yukiue H, Kobayashi Y, Yano M, Fujii Y: **PIK3CA mutation status in Japanese lung cancer patients.** *Lung Cancer* 2006, **54**(2):209-215.
  17. Okudela K, Suzuki M, Kageyama S, Bunai T, Nagura K, Igarashi H, Takamochi K, Suzuki K, Yamada T, Niwa H *et al*: **PIK3CA mutation and amplification in human lung cancer.** *Pathol Int* 2007, **57**(10):664-671.
  18. Yamamoto H, Shigematsu H, Nomura M, Lockwood WW, Sato M, Okumura N, Soh J, Suzuki M, Wistuba, II, Fong KM *et al*: **PIK3CA mutations and copy number gains in human lung cancers.** *Cancer Res* 2008, **68**(17):6913-6921.
  19. Spoerke JM, O'Brien C, Huw L, Koeppen H, Fridlyand J, Brachmann RK, Haverty PM, Pandita A, Mohan S, Sampath D *et al*: **Phosphoinositide 3-kinase (PI3K) pathway alterations are associated with histologic subtypes and are predictive of sensitivity to PI3K inhibitors in lung cancer preclinical models.** *Clin Cancer Res* 2012, **18**(24):6771-6783.
  20. Ohashi K, Sequist LV, Arcila ME, Lovly CM, Chen X, Rudin CM, Moran T, Camidge DR, Vnencak-Jones CL, Berry L *et al*: **Characteristics of lung cancers harboring NRAS mutations.** *Clin Cancer Res* 2013, **19**(9):2584-2591.
  21. Marks JL, Gong Y, Chitale D, Golas B, McLellan MD, Kasai Y, Ding L, Mardis ER, Wilson RK, Solit D *et al*: **Novel MEK1 mutation identified by mutational analysis of epidermal growth factor receptor signaling pathway genes in lung adenocarcinoma.** *Cancer Res* 2008, **68**(14):5524-5528.
  22. Bleeker FE, Felicioni L, Buttitta F, Lamba S, Cardone L, Rodolfo M, Scarpa A, Leenstra S, Frattini M, Barbareschi M *et al*: **AKT1(E17K) in human solid tumours.** *Oncogene* 2008, **27**(42):5648-5650.
  23. Hammerman PS, Sos ML, Ramos AH, Xu C, Dutt A, Zhou W, Brace LE, Woods BA, Lin W, Zhang J *et al*: **Mutations in the DDR2 kinase gene identify a novel therapeutic target in squamous cell lung cancer.** *Cancer discovery* 2011, **1**(1):78-89.
  24. Shigematsu H, Takahashi T, Nomura M, Majmudar K, Suzuki M, Lee H, Wistuba, II, Fong KM, Toyooka S, Shimizu N *et al*: **Somatic mutations of the HER2 kinase domain in lung adenocarcinomas.** *Cancer Res* 2005, **65**(5):1642-1646.
  25. De Greve J, Teugels E, Geers C, Decoster L, Galdermans D, De Mey J, Everaert H, Umelo I, In't Veld P, Schallier D: **Clinical activity of afatinib (BIBW 2992) in patients with lung adenocarcinoma with mutations in the kinase domain of HER2/neu.** *Lung Cancer* 2012, **76**(1):123-127.
  26. Engelman JA, Zejnullahu K, Mitsudomi T, Song Y, Hyland C, Park JO, Lindeman N, Gale CM, Zhao X, Christensen J *et al*: **MET amplification leads to gefitinib resistance in lung cancer by activating ERBB3 signaling.** *Science* 2007, **316**(5827):1039-1043.
  27. Dienstmann R, Rodon J, Prat A, Perez-Garcia J, Adamo B, Felip E, Cortes J, Iafrate AJ, Nuciforo P, Tabernero J: **Genomic aberrations in the FGFR pathway: opportunities for targeted therapies in solid tumors.** *Ann Oncol* 2013.
  28. Soda M, Choi YL, Enomoto M, Takada S, Yamashita Y, Ishikawa S, Fujiwara S, Watanabe H, Kurashina K, Hatanaka H *et al*: **Identification of the transforming EML4-ALK fusion gene in non-small-cell lung cancer.** *Nature* 2007, **448**(7153):561-566.
  29. Sun Y, Ren Y, Fang Z, Li C, Fang R, Gao B, Han X, Tian W, Pao W, Chen H *et al*: **Lung adenocarcinoma from East Asian never-smokers is a disease largely**

- defined by targetable oncogenic mutant kinases. *J Clin Oncol* 2010, **28**(30):4616-4620.**
30. Bergethon K, Shaw AT, Ou SH, Katayama R, Lovly CM, McDonald NT, Massion PP, Siwak-Tapp C, Gonzalez A, Fang R *et al*: **ROS1 rearrangements define a unique molecular class of lung cancers.** *J Clin Oncol* 2012, **30**(8):863-870.
31. Li C, Fang R, Sun Y, Han X, Li F, Gao B, Iafrate AJ, Liu XY, Pao W, Chen H *et al*: **Spectrum of oncogenic driver mutations in lung adenocarcinomas from East Asian never smokers.** *PLoS One* 2011, **6**(11):e28204.
32. Kohno T, Ichikawa H, Totoki Y, Yasuda K, Hiramoto M, Nammo T, Sakamoto H, Tsuta K, Furuta K, Shimada Y *et al*: **KIF5B-RET fusions in lung adenocarcinoma.** *Nat Med* 2012, **18**(3):375-377.
33. Takeuchi K, Choi YL, Togashi Y, Soda M, Hatano S, Inamura K, Takada S, Ueno T, Yamashita Y, Satoh Y *et al*: **KIF5B-ALK, a novel fusion oncokinase identified by an immunohistochemistry-based diagnostic system for ALK-positive lung cancer.** *Clin Cancer Res* 2009, **15**(9):3143-3149.
34. Lipson D, Capelletti M, Yelensky R, Otto G, Parker A, Jarosz M, Curran JA, Balasubramanian S, Bloom T, Brennan KW *et al*: **Identification of new ALK and RET gene fusions from colorectal and lung cancer biopsies.** *Nat Med* 2012, **18**(3):382-384.
35. Ju YS, Lee WC, Shin JY, Lee S, Bleazard T, Won JK, Kim YT, Kim JI, Kang JH, Seo JS: **A transforming KIF5B and RET gene fusion in lung adenocarcinoma revealed from whole-genome and transcriptome sequencing.** *Genome Res* 2012, **22**(3):436-445.
